# Supplementary material for: Longitudinal Risk Factors For Developing Depression in Parkinson’s Disease
Source: bioRxiv or medRxiv preprint supplement (doi:10.1101/2021.06.29.21259714), 2021-07-03
Supplement: Supplementary file [file media-1.pdf]

## Supplemental Figure 1

Kaplan-Meier curves with number at risk tables for comparison of the depression measures used in both cohorts.

### PPMI

**A**

Likelihood of Patient Remaining Non-Depressed (GDS)

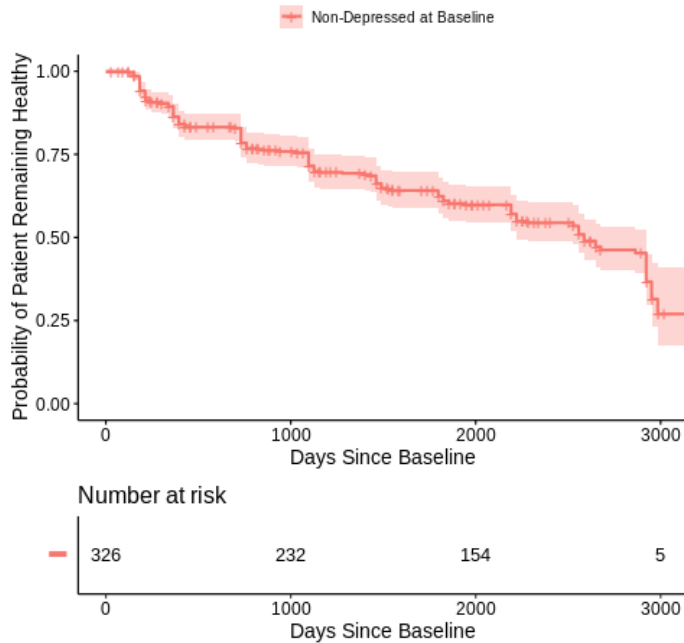

### PDBP

**B**

Likelihood of Patient Remaining Non-Depressed (HDRS)

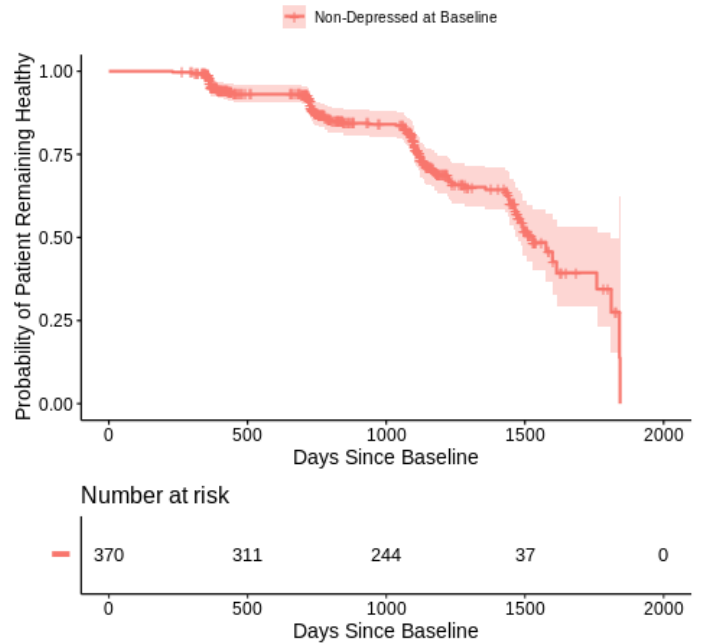

Likelihood of Patient Remaining Non-Depressed (UPDRSd)

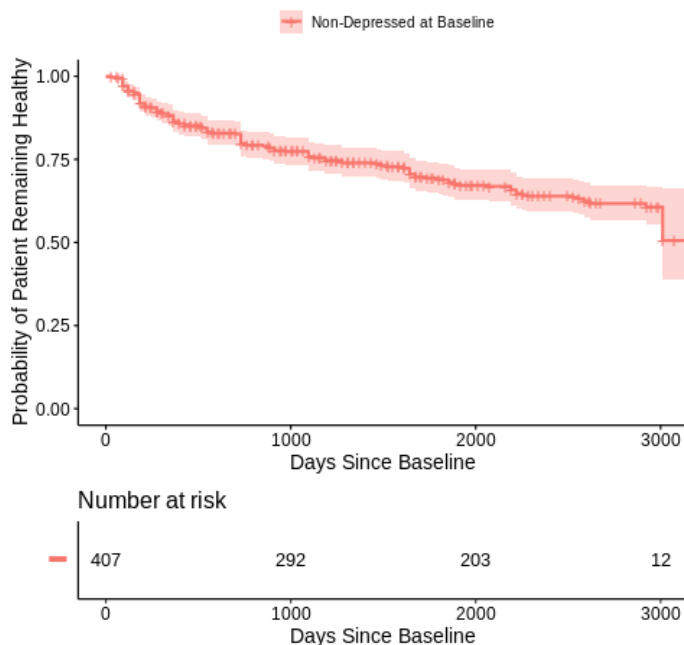

Likelihood of Patient Remaining Non-Depressed (UPDRSd)

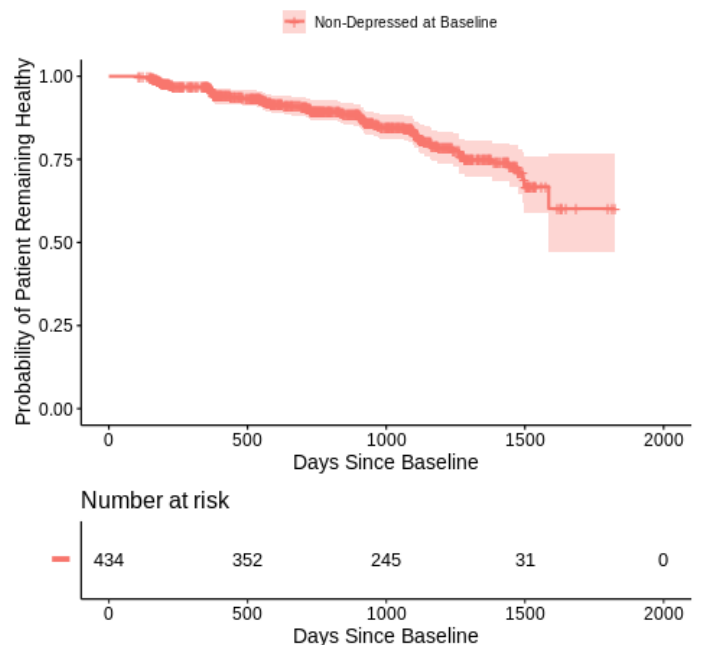

GDS, Geriatric Depression Scale; HDRS, Hamilton Depression Rating Scale; UPDRSd, Movement Disorder Society revised Unified Parkinson's Disease Rating Scale Part I Item 3

### Supplemental Table 1

Results of linear mixed effects model analyzing the linear relationship between time since baseline and scores on various measures of depressive symptoms.

| PPMI                      |                         |         | PDBP                       |                         |         |
|---------------------------|-------------------------|---------|----------------------------|-------------------------|---------|
| Item<br>[score range]     | Estimate<br>[95%C.I.]   | p-value | Item<br>[score range]      | Estimate<br>[95%C.I.]   | p-value |
| GDS Total<br>Score [0,15] | 0.086<br>[0.067, 0.106] | <2e-16  | HDRS Total<br>Score [0,31] | 0.679<br>[0.56, 0.80]   | <2e-16  |
| UPDRSd [0, 4]             | 0.026<br>[0.018, 0.034] | 2.0e-9  | UPDRSd [0,4]               | 0.068<br>[0.049, 0.087] | 3.1e-12 |

GDS, Geriatric Depression Scale; HDRS, Hamilton Depression Rating Scale; UPDRSd, Movement Disorder Society revised Unified Parkinson's Disease Rating Scale Part I Item 3

### Supplemental Figure 2

PPMI Cohort (with baseline adjusted to account for difference in median duration of diagnosis)

PDBP (with unchanged baseline)

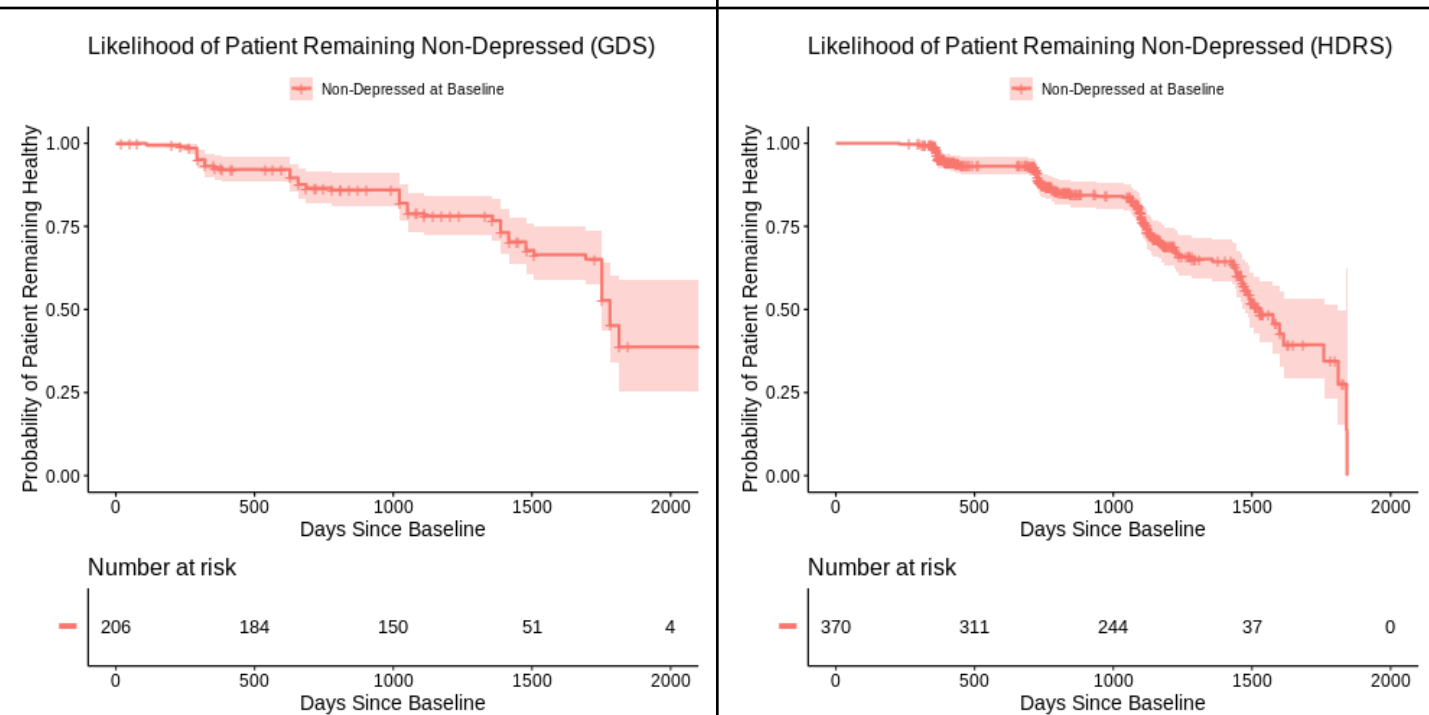

GDS, Geriatric Depression Scale; HDRS, Hamilton Depression Rating Scale

### Supplemental Figure 3

Kaplan-Meier curves with number at risk tables for variables that were associated with an increased risk of depression in either cohort using their respective depression-specific scales.

#### PPMI

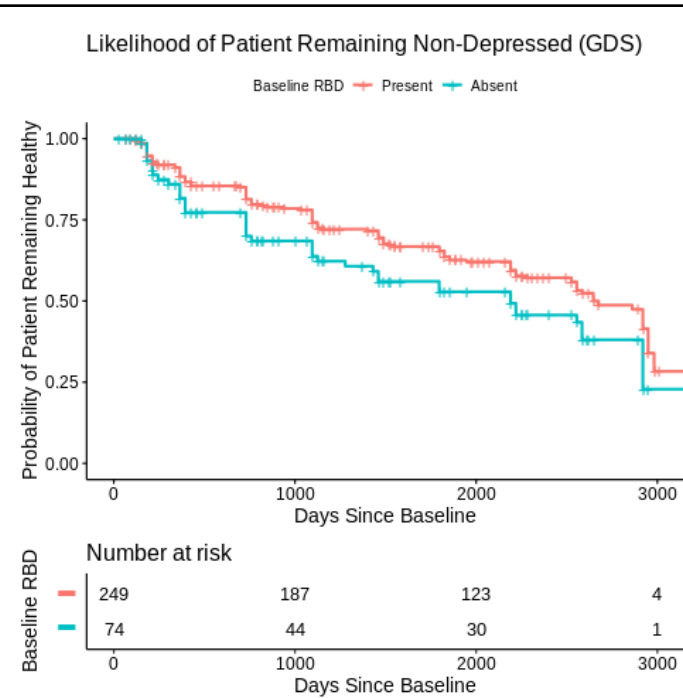

#### PDBP

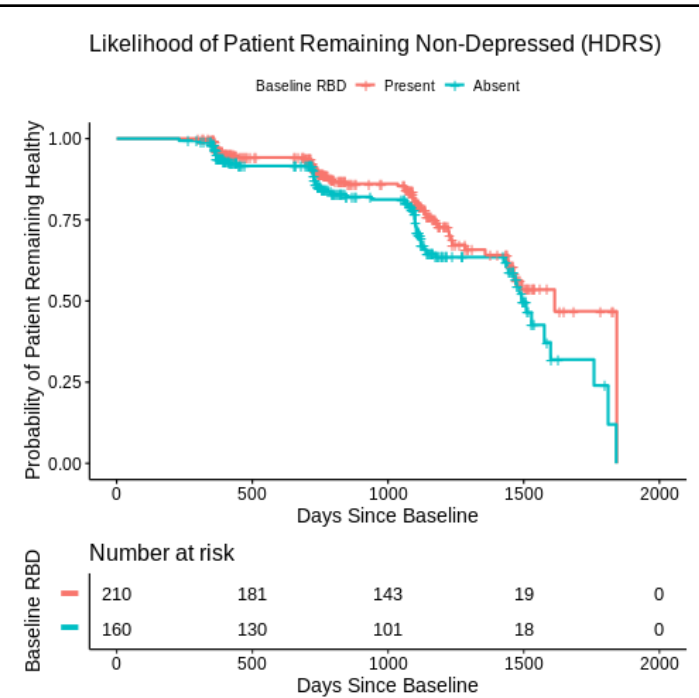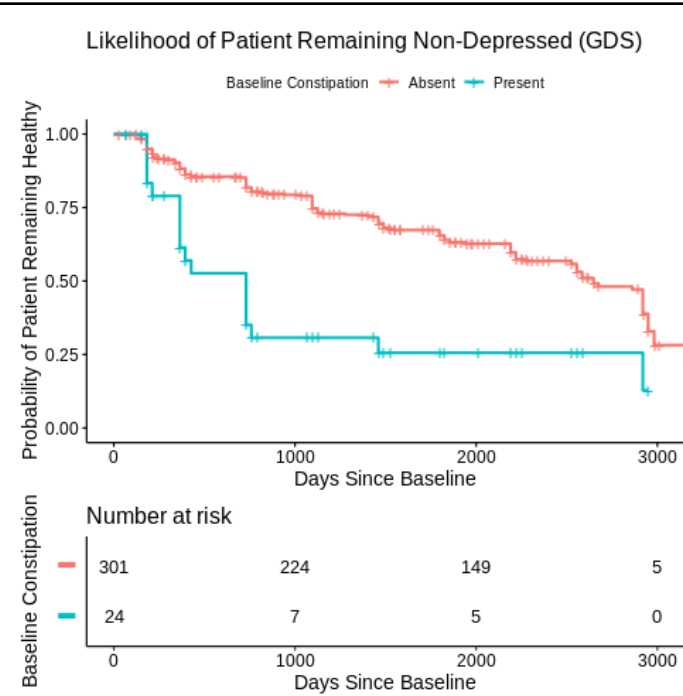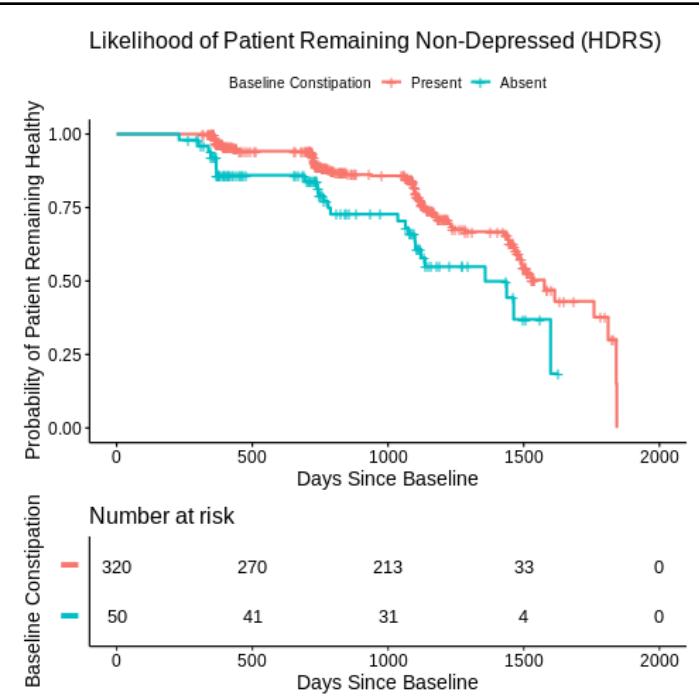

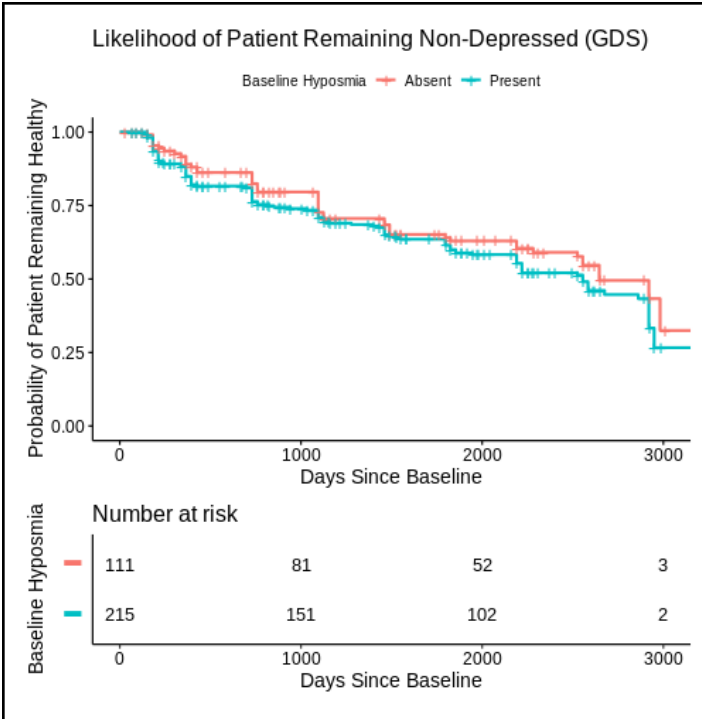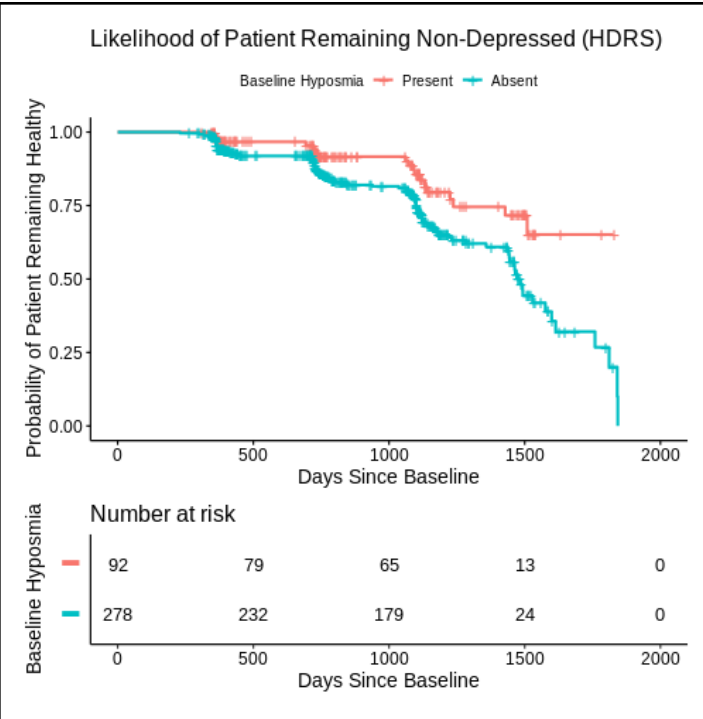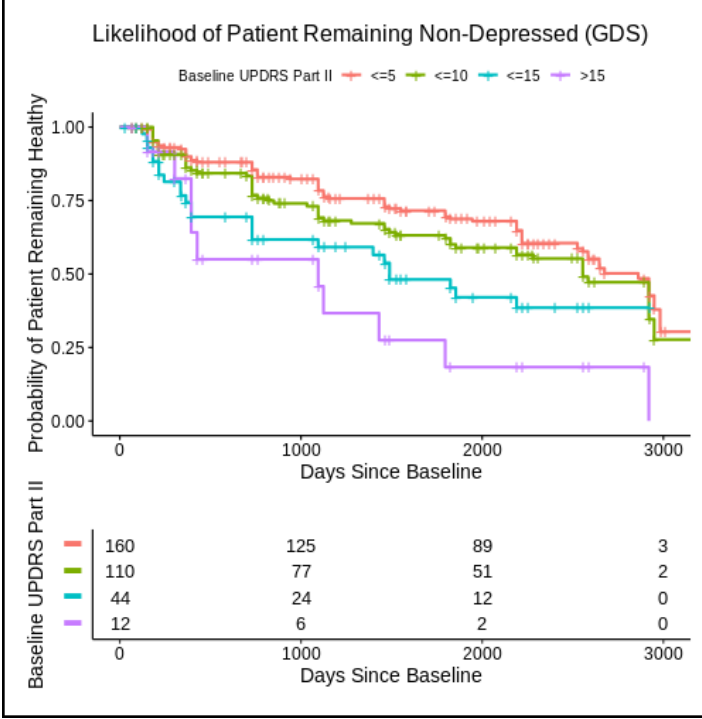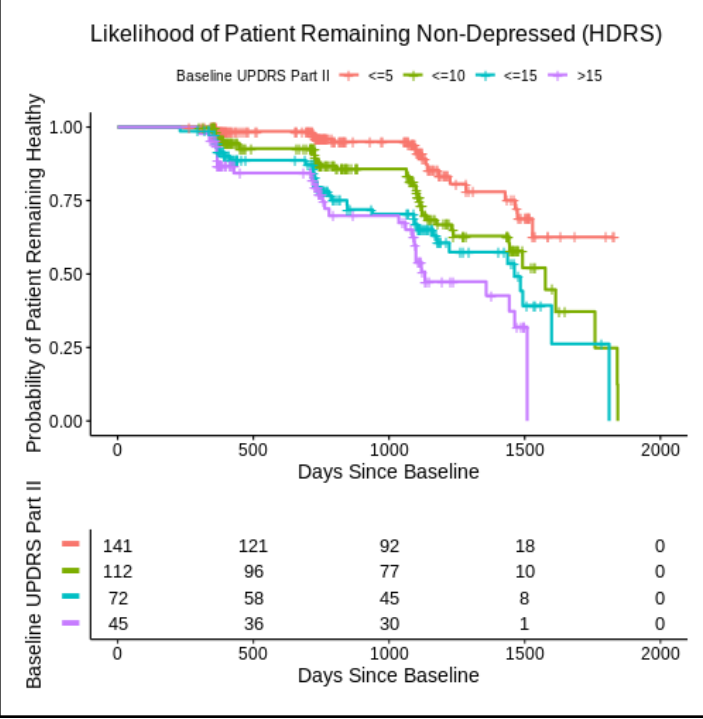

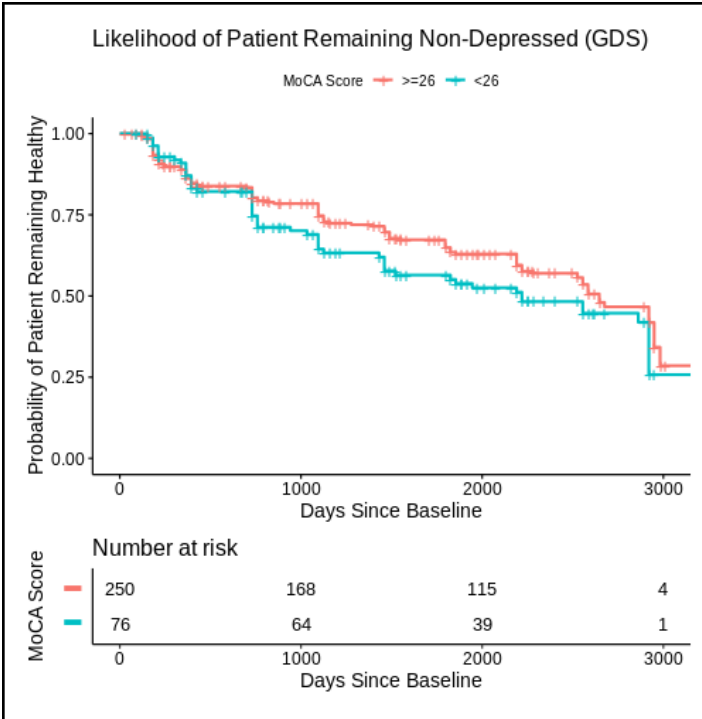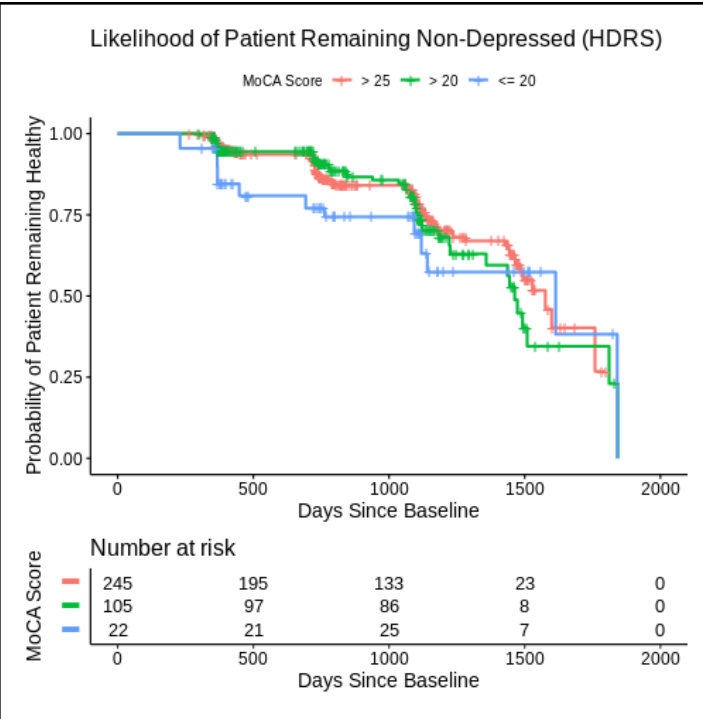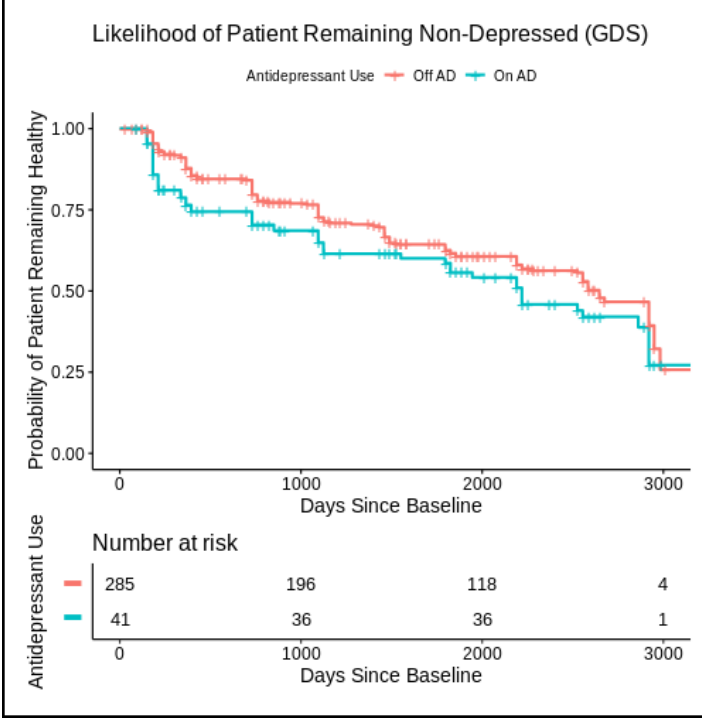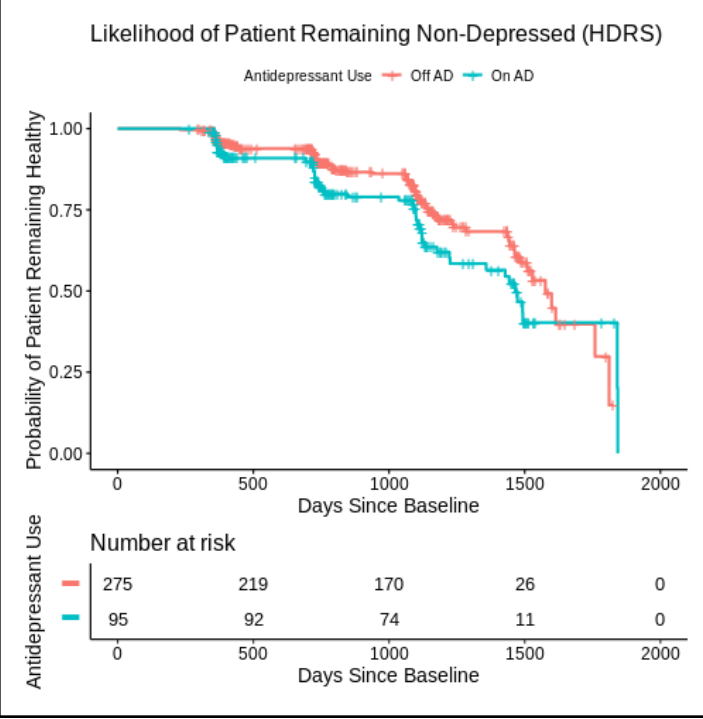

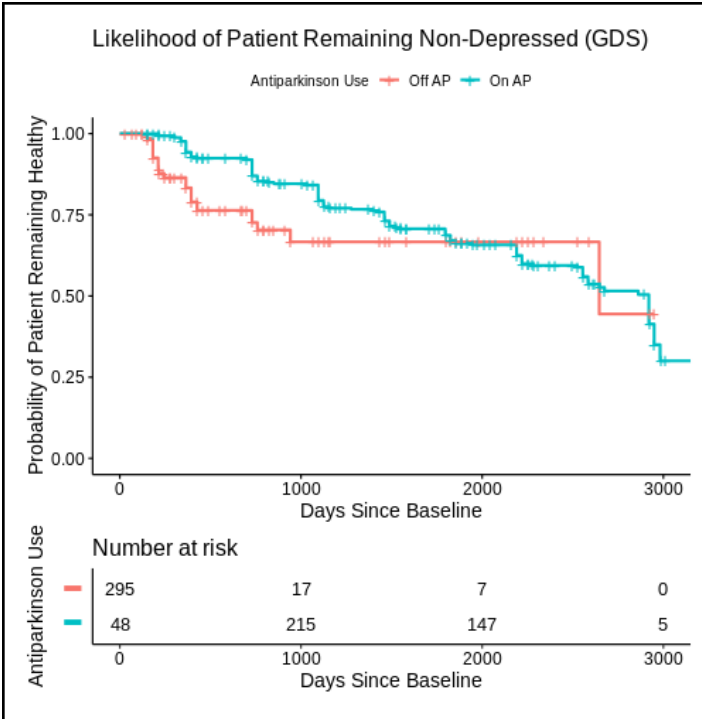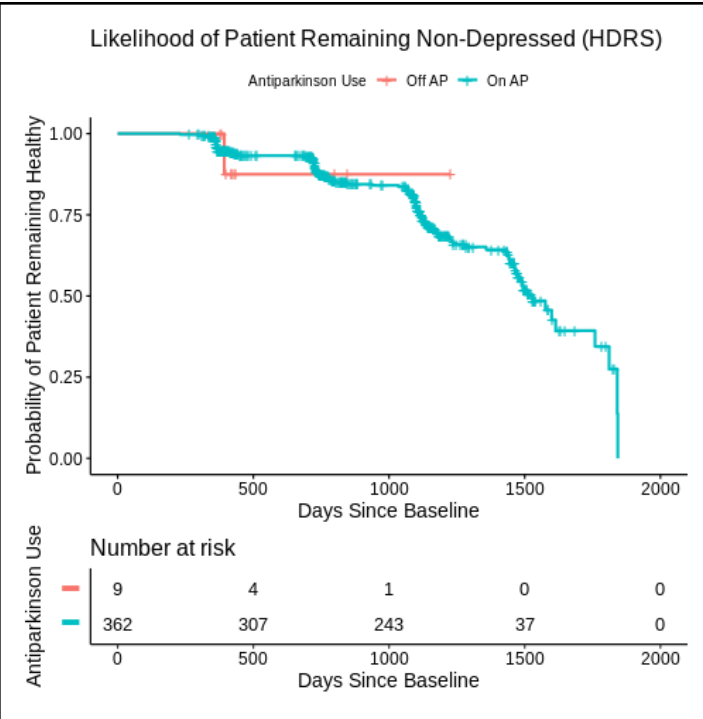

GDS, Geriatric Depression Scale; HDRS, Hamilton Depression Rating Scale; AD, Antidepressant; AP, Antiparkinson

**Supplemental Table 2**

Summary of meta-analysis of the cox proportional hazards models for depression in PPMI and PDBP using the UPDRS depressed mood item.

|                                                          | PPMI                 |            | PDBP                 |            | Meta-Analysis        |             |                |
|----------------------------------------------------------|----------------------|------------|----------------------|------------|----------------------|-------------|----------------|
|                                                          | HR<br>[95% CI]       | p-value    | HR<br>[95% CI]       | p-value    | HR [95%<br>CI]       | p-value     | I <sup>2</sup> |
| <i>Baseline Predictive Covariates (Time-Independent)</i> |                      |            |                      |            |                      |             |                |
| College Education or Greater                             | 0.85<br>[0.60, 1.22] | 0.38       | 0.62<br>[0.46, 0.85] | 2.7e-3 **  | 0.72<br>[0.53, 0.98] | 0.04 *      | 42.6%          |
| Gender (Male as Reference)                               | 1.46<br>[1.02, 2.08] | 0.04 *     | 1.16<br>[0.90, 1.50] | 0.26       | 1.25<br>[1.01, 1.55] | 0.04*       | 3.5%           |
| Age at Baseline                                          | 1.01<br>[0.99, 1.03] | 0.45       | 0.98<br>[0.95, 1.01] | 0.16       | 1.00<br>[0.97, 1.02] | 0.74        | 61.2%          |
| Baseline Duration of Diagnosis                           | 0.83<br>[0.60, 1.15] | 0.26       | 1.00<br>[0.95, 1.06] | 0.97       | 0.98<br>[0.86, 1.11] | 0.71        | 14.6%          |
| Baseline UPDRS Part II Total                             | 1.05<br>[1.01, 1.10] | 0.02 *     | 1.06<br>[1.04, 1.09] | 3.6e-7 *** | 1.06<br>[1.04, 1.08] | <1e-4 ***   | 0.0%           |
| Probable RBD at Baseline                                 | 1.19<br>[0.81, 1.75] | 0.39       | 1.49<br>[1.22, 1.81] | 7.1e-5 *** | 1.42<br>[1.18, 1.70] | 2e-4 ***    | 3.19%          |
| Baseline Hyposmia                                        | 1.22<br>[0.84, 1.76] | 0.31       | 1.17<br>[0.79, 1.74] | 0.43       | 1.19<br>[0.91, 1.57] | 0.20        | 67.2%          |
| Baseline Presence of Constipation                        | 2.74<br>[1.63, 4.59] | 1.3e-4 *** | 1.32<br>[1.02, 1.71] | 0.04 *     | 1.83<br>[0.90, 3.74] | 0.10        | 83.7% *        |
| <i>Adjustment Covariates (Time-Dependent)</i>            |                      |            |                      |            |                      |             |                |
| MoCA Total Score                                         | 0.97<br>[0.91, 1.03] | 0.29       | 0.99<br>[0.94, 1.04] | 0.77       | 0.98<br>[0.95, 1.02] | 0.36        | 0.0%           |
| Use of Antidepressants                                   | 2.62<br>[1.81, 3.80] | 3.7e-7 *** | 1.99<br>[1.06, 3.73] | 0.03 *     | 2.44<br>[1.77, 3.36] | <1.0e-4 *** | 0.0%           |

RBD, REM Sleep Behavior Disorder. UPDRS, Movement Disorder Society revised Unified Parkinson's Disease Rating Scale; MoCA, Montreal Cognitive Assessment;  
 \*\*\*: p< 0.001, \*\*: p<0.01, \*: p<0.05. (t-test).
